# Supplementary material
Source: Springer Nature journal article supplement (https://www.springermedizin.de/resource/supplementary/12943_2010_670_MOESM5_ESM.pdf/9554538)

**A**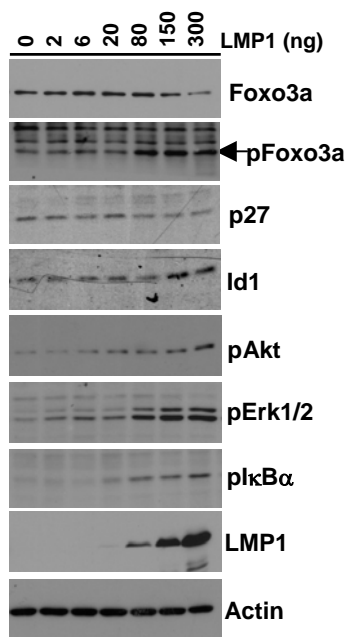**B**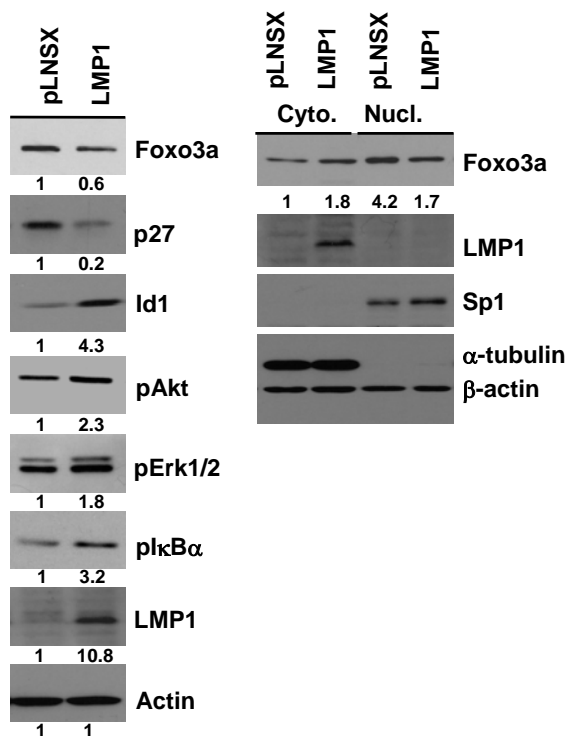**C**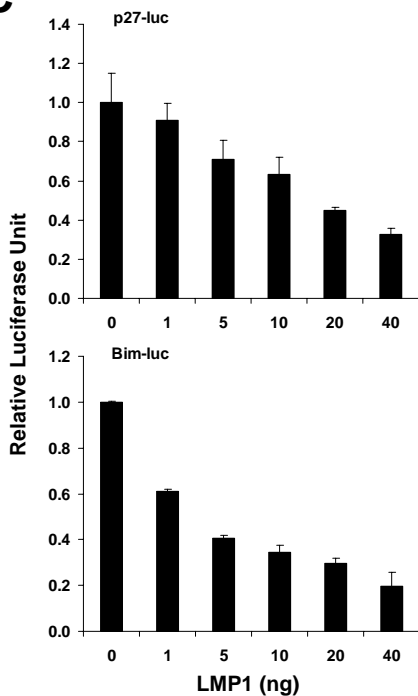**D**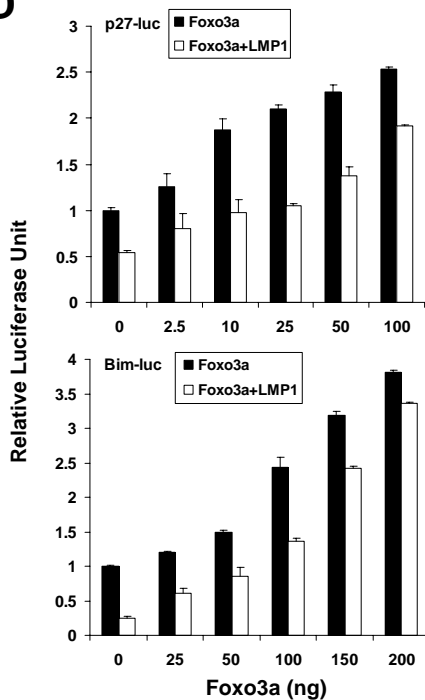

Supplement: MOESM5 [file 9554538]
